# Supplementary material for: Analyzing dissemination, quality, and reliability of Chinese brain tumor-related short videos on TikTok and Bilibili: a cross-sectional study
Source: Front Neurol. 2024 Oct 18;15:1404038. doi: 10.3389/fneur.2024.1404038 (PMC11527622; doi:10.3389/fneur.2024.1404038)
Supplement: Supplementary file 2 [file Table_2.XLSX]

## Sheet: Table S2
Table S2 Description of GQS score.
Scale	Description
1	Poor quality, poor flow of the site, most information missing, not at all useful for patients
2	Generally poor quality and poor flow, some information listed but many important topics missing, of very limited use to patients
3	Moderate quality, suboptimal flow, some important information is adequately discussed but others poorly discussed, somewhat useful for patients
4	Good quality and generally good flow, most of the relevant information is listed, but some topics not covered, useful for patients
5	Excellent quality and excellent flow, very useful for patients
Abbreviations: GQS, Global Quality Score.
